# Supplementary material for: Dynamics of Two Anadromous Species in a Dam Intersected River: Analysis of Two 100-Year Datasets
Source: MDPI journal article supplement (doi:10.3390/fishes6020021), 2021-06-05
Supplement: s1 [file s1]

# Dynamics of Two Anadromous Species in a Dam Intersected River: Analysis of Two 100-Year Datasets

Ulisses M Azeiteiro, Mário J Pereira, Amadeu MVM Soares, Heitor O. Braga, Fernando Morgado, Magda C. Sousa, João M. Dias and Carlos Antunes

## Supplementary Material

### Correlation between environmental variables

This analysis showed only one significant correlation between average sea surface temperature and average air temperature (Table S1).

**Table S1.** Correlation coefficients between the possible pairs of environmental variables.

| CORRELATION<br>COEFFICIENT | SST    | air T°C | NAO    | Precipitation |
|----------------------------|--------|---------|--------|---------------|
| SST                        |        |         |        |               |
| air T°C                    | 0.57   |         |        |               |
| NAO                        | -0.01  | -0.09   |        |               |
| Precipitation              | 0.04   | -0.11   | 0.09   |               |
| P-VALUE                    | SST    | air T°C | NAO    | Precipitation |
| SST                        |        |         |        |               |
| air T°C                    | 0.0000 |         |        |               |
| NAO                        | 0.8805 | 0.3803  |        |               |
| Precipitation              | 0.7140 | 0.2593  | 0.3380 |               |

### Time series analysis of fish captures

Analysis of the behaviour of fish capture data as a time series was identified using Differencing Methods. This resulted in a decomposition of the time series between a trend and random error (as no seasonal effects were recorded; Figures S1 and S2).

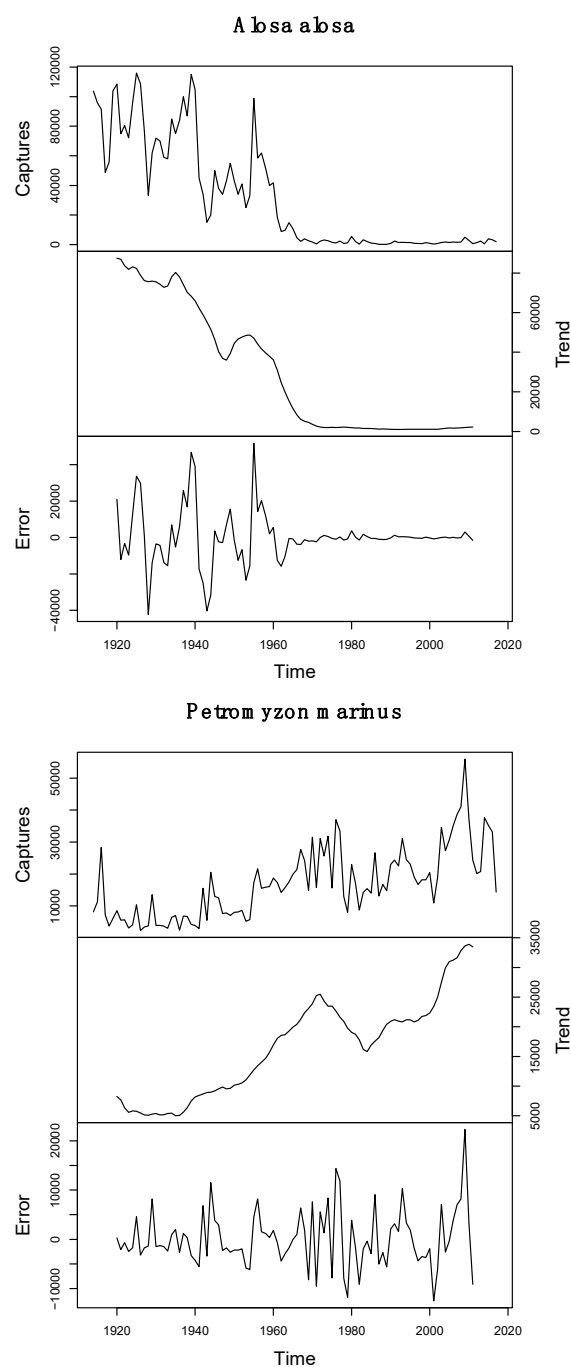

**Figure S1.** Decomposition of the time series data of A) *Alosa alosa* and B) *Petromyzon marinus*. The top panel shows original captures, the middle panel shows the resulting trend, and the bottom panel shows the random error.

### Multiple linear regression of the fish capture data

Linear models were fitted for *A. alosa* and *P. marinus* captures using precipitation, air temperature, NAO, and upwelling index using only the years for which all variables had data (intersect data). Model results are presented in Tables S2 and S3.

**Table S2.** Model results of the Linear Regression for *Alosa alosa* captures with environmental variables as regressors (intersect data).

| Coefficients | Estimate | Standard Error | t-value | P-value |
|--------------|----------|----------------|---------|---------|
|--------------|----------|----------------|---------|---------|

|                                                                                                                                                                                           |          |          |        |       |
|-------------------------------------------------------------------------------------------------------------------------------------------------------------------------------------------|----------|----------|--------|-------|
| <i>Alosa alosa</i> captures (units)                                                                                                                                                       | 3040.884 | 4419.357 | 0.688  | 0.498 |
| Monthly Precipitation                                                                                                                                                                     | 6.950    | 6.631    | 1.048  | 0.305 |
| Monthly Air Temperature                                                                                                                                                                   | -170.248 | 296.022  | -0.575 | 0.571 |
| North Atlantic Oscillation                                                                                                                                                                | -240.427 | 452.217  | -0.532 | 0.600 |
| Upwelling Index                                                                                                                                                                           | 2.355    | 1.956    | 1.204  | 0.240 |
| Residual Standard Error: 1269 on 24 Degrees of Freedom (DF)   Multiple R <sup>2</sup> : 0.1031   Adjusted R <sup>2</sup> : -0.04643   F-statistic: 0.6894 on 4 and 24 DF, P-value: 0.6064 |          |          |        |       |

**Table S3.** Model results of the Linear Regression for *Petromyzon marinus* captures with environmental variables as regressors (intersect data).

| Coefficients                                                                                                                                                                            | Estimate | Standard Error | t-value | P-value |
|-----------------------------------------------------------------------------------------------------------------------------------------------------------------------------------------|----------|----------------|---------|---------|
| <i>Petromyzon marinus</i> captures (units)                                                                                                                                              | 8614.60  | 27646.93       | 0.312   | 0.7580  |
| Monthly Precipitation                                                                                                                                                                   | 74.59    | 41.48          | 1.798   | 0.0847  |
| Monthly Air Temperature                                                                                                                                                                 | 181.56   | 1851.88        | 0.098   | 0.9227  |
| North Atlantic Oscillation                                                                                                                                                              | 1037.57  | 2829.01        | 0.367   | 0.7170  |
| Upwelling Index                                                                                                                                                                         | 17.04    | 12.24          | 1.392   | 0.1767  |
| Residual Standard Error: 7940 on 24 Degrees of Freedom (DF)   Multiple R <sup>2</sup> : 0.1971   Adjusted R <sup>2</sup> : 0.06331   F-statistic: 1.473 on 4 and 24 DF, P-value: 0.2415 |          |                |         |         |

Linear models were also fitted for *A. alosa* and *P. marinus* captures using precipitation, air temperature, NAO, and upwelling index using only the variables for which data were available for the entire time series. Model results are presented in Tables S4 and S5.

**Table S4.** Model results of the Linear Regression for *Alosa alosa* captures with environmental variables as regressors.

| Coefficients                                                                                                                                                                                 | Estimate  | Standard Error | t-value | P-value |
|----------------------------------------------------------------------------------------------------------------------------------------------------------------------------------------------|-----------|----------------|---------|---------|
| <i>Alosa alosa</i> captures (units)                                                                                                                                                          | 104335.60 | 65870.29       | 1584    | 0.116   |
| Monthly Average Precipitation                                                                                                                                                                | -62.39    | 107.66         | -0.580  | 0.564   |
| Monthly Air Temperature                                                                                                                                                                      | -4643.66  | 4454.50        | -1.042  | 0.300   |
| North Atlantic Oscillation                                                                                                                                                                   | -4345.54  | 5862.32        | -0.741  | 0.460   |
| Residual Standard Error: 37090 on 100 Degrees of Freedom (DF)   Multiple R <sup>2</sup> : 0.01784   Adjusted R <sup>2</sup> : -0.01163   F-statistic: 0.6054 On 3 And 100 DF, P-value: 0.613 |           |                |         |         |

**Table S5.** Model results of the Linear Regression for *Petromyzon marinus* captures with environmental variables as regressors.

| Coefficients                                                                                                                                                                                 | Estimate | Standard Error | t-value | P-value |
|----------------------------------------------------------------------------------------------------------------------------------------------------------------------------------------------|----------|----------------|---------|---------|
| <i>Petromyzon marinus</i> captures (units)                                                                                                                                                   | -3656.54 | 19486.53       | -0.188  | 0.852   |
| Monthly Average Precipitation                                                                                                                                                                | 22.73    | 31.85          | 0.714   | 0.477   |
| Monthly Air Temperature                                                                                                                                                                      | 1270.72  | 1317.78        | 0.964   | 0.337   |
| North Atlantic Oscillation                                                                                                                                                                   | -451.32  | 1734.26        | -0.260  | 0.795   |
| Residual Standard Error: 10970 on 100 Degrees Of Freedom (DF)   Multiple R <sup>2</sup> : 0.01369   Adjusted R <sup>2</sup> : -0.0159   F-statistic: 0.4625 On 3 And 100 DF, P-value: 0.7091 |          |                |         |         |

### Intervention analysis

Preliminary ARIMA models were fitted with the data transformations that presented the best results for each species dataset. Accuracies of these models are presented in Tables S6 and S7.

**Table S6.** Performance measurements of ARIMA models with the original, log, and  $\Delta$ log transformed *Alosa alosa* capture data. The model with log transformation performed better.

| Transformation | ME          | RMSE      | MAE       | ACF1        | AIC   | AICc  | BIC   |
|----------------|-------------|-----------|-----------|-------------|-------|-------|-------|
| log            | -0.06710364 | 0.3378423 | 0.2432781 | -0.08379447 | 34.75 | 35.41 | 39.81 |
| $\Delta$ log   | -0.06907031 | 0.3420343 | 0.2490714 | -0.08410868 | 34.75 | 35.41 | 39.81 |

ME, Mean Error; RMSE, Root Mean Squared Error; MAE, Mean Absolute Error; ACF1, Autocorrelation of errors at lag 1; AIC, Akaike Information Criterion; AICc, Corrected Akaike Information Criterion; BIC, Bayesian Information Criterion

**Table S7.** Performance measurements of ARIMA models with the original, log,  $\Delta$ log, and  $\Delta$ log12 transformed *Petromyzon marinus* capture data. The model with  $\Delta$ log performed better.

| Transformation | ME            | RMSE      | MAE       | ACF1        | AIC   | AICc  | BIC   |
|----------------|---------------|-----------|-----------|-------------|-------|-------|-------|
| log            | -4.887146e-14 | 0.5650506 | 0.4506777 | 0.221383    | 73.54 | 73.86 | 76.97 |
| $\Delta$ log   | -0.03174938   | 0.5689634 | 0.4524447 | 0.003259193 | 73.23 | 73.56 | 76.61 |
| $\Delta$ log12 | 0.186168      | 0.8858761 | 0.6510311 | -0.07279541 | 78.49 | 78.97 | 81.15 |

ME, Mean Error; RMSE, Root Mean Squared Error; MAE, Mean Absolute Error; ACF1, Autocorrelation of errors at lag 1; AIC, Akaike Information Criterion; AICc, Corrected Akaike Information Criterion; BIC, Bayesian Information Criterion

Although the previous analyses indicated that models with log and  $\Delta$ log transformation would perform better, ARIMA models were fitted with all data transformations. The model with the data transformation presenting the lowest AIC was chosen as the best to explain the pre-intervention capture data (Tables S8 and S9). For *A. alosa* captures, the best ARIMA model was ARIMA(0,0,2) with non-zero mean and using  $\Delta$ log transformed data. For *P. marinus* captures, the best model was ARIMA(0,0,0) with non-zero mean and using log transformed data.

**Table S8.** ARIMA models for pre-intervention (1914-1954) capture data of *Alosa alosa*. Two models were tested, with log and  $\Delta$ log transformation, as they had previously shown very small differences.

| Model                                          | ma1    | ma2     | sma1    | mean    | AIC   | AICc  | BIC   |
|------------------------------------------------|--------|---------|---------|---------|-------|-------|-------|
| log [ARIMA(0,1,2)]                             | 0.2095 | -0.7905 | -0.1356 | n.a.    | 35.99 | 37.13 | 42.75 |
| $\Delta$ log [ARIMA(0,0,2) with non-zero mean] | 0.0000 | -1.0000 | -0.0946 | -0.0261 | 34    | 35.76 | 42.44 |

ma1, ma2, sma1, and mean are ARIMA model coefficients; AIC, Akaike Information Criterion; AICc, Corrected Akaike Information Criterion; BIC, Bayesian Information Criterion

**Table S9.** ARIMA models for pre-intervention (1914-1954) capture data of *Petromyzon marinus*. Three models were tested, with log,  $\Delta$ log, and  $\Delta$ log12 transformation, as they had previously shown very small differences.

| Model                                          | ma1     | sma1    | mean    | AIC   | AICc  | BIC   |
|------------------------------------------------|---------|---------|---------|-------|-------|-------|
| log [ARIMA(0,0,0) with non-zero mean]          | n.a.    | 0.1772  | 8.7415  | 73.9  | 74.55 | 79.04 |
| $\Delta$ log [ARIMA(0,0,1) with non-zero mean] | -0.4133 | -0.4133 | -0.0133 | 78.35 | 79.49 | 85.1  |
| $\Delta$ log12 [ARIMA(0,1,1)]                  | -0.4261 | -0.4261 | n.a.    | 81.5  | 82.5  | 85.5  |

ma1, ma2, sma1, and mean are ARIMA model coefficients; AIC, Akaike Information Criterion; AICc, Corrected Akaike Information Criterion; BIC, Bayesian Information Criterion

It was also investigated whether there were any structural breaks with respect to a constant level as regressor. The structural breaks found for each time series are reported in Figure S4. These breakpoints indicate dates where a specific and abrupt variation in the data was observed.

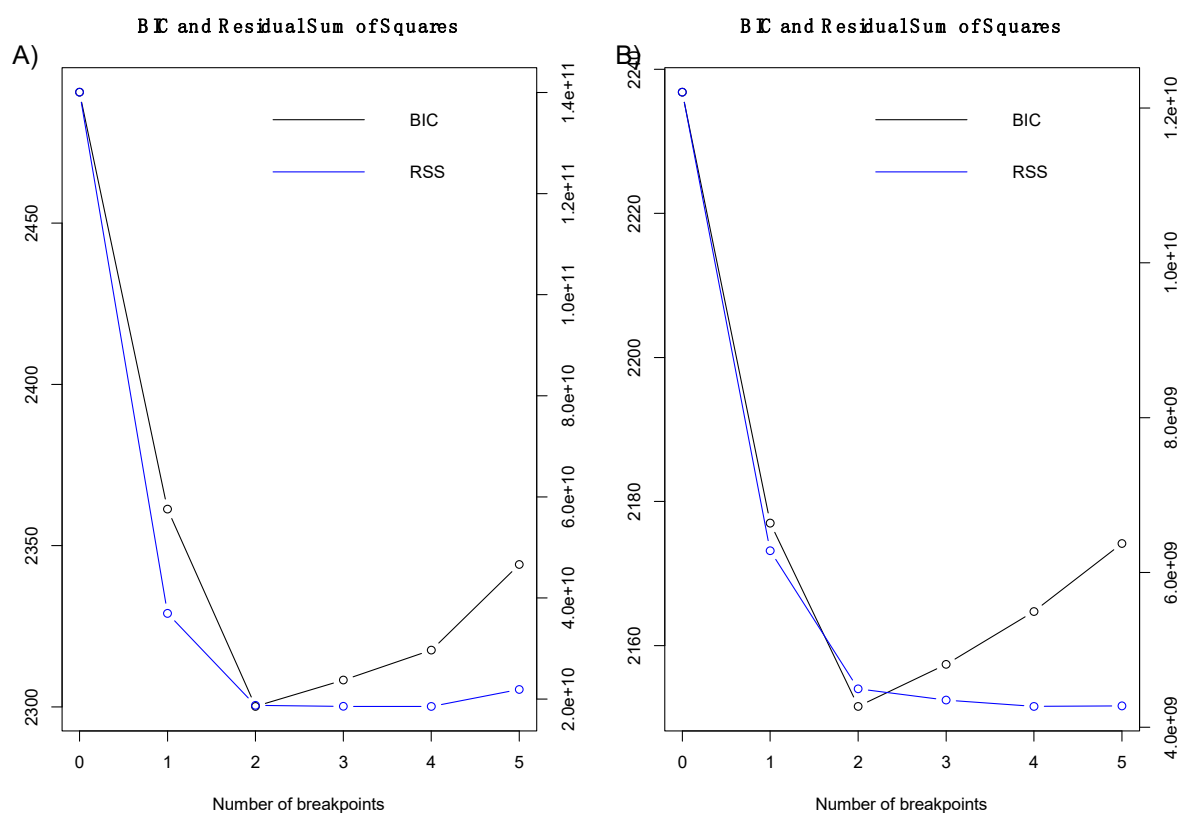

**Figure S2.** Plot of the Bayesian Inference Coefficient (BIC) value against the number of breakpoints for each species: *Alosa alosa* (A) and *Petromyzon marinus* (B) capture data.
