# Supplementary material for: Dynamics of Two Anadromous Species in a Dam Intersected River: Analysis of Two 100-Year Datasets
Source: MDPI journal article supplement (doi:10.3390/fishes6020021), 2021-06-05
Supplement: s1 [file s1]

Archive with 1 entries (1 files):
- fishes-1212029-supplementary.pdf
